# Supplementary material
Source: PubMed Central journal article supplement (PMC2867688)
Supplement: 0913113107_pnas.200913113SI.pdf [file 0913113107_pnas.200913113SI.pdf]

# Supporting Information

Palva et al. 10.1073/pnas.0913113107

## SI Text

**Filtering.** The time series of each channel,  $y_j(t)$ , of the single-trial MEEG,  $Y(t)$ , with  $n_c$  channels  $j = 1 \dots n_c$  (here,  $n_c = 366$ ), was filtered into 36 frequency bands with a bank of Morlet wavelets  $h(t,f)$  that had roughly log-linearly spaced center frequencies,  $f$  ( $f = 3 \dots 90$  Hz) (Fig. S1C). The complex-filtered signal  $y_F(t,f)$  was given by  $y_F(t,f) = y(t) * h(t,f)$ , where  $*$  denotes convolution and  $h(t,f) = A \exp(-t^2/2\sigma_t^2) \exp(2i\pi ft)$ . The time domain SD,  $\sigma_t$ , of the wavelet is  $\sigma_t = m/2\pi f$ , where the parameter  $m$  ( $m = 5$ ) defines the compromise between time and frequency resolution.

**Forward and Inverse Modeling.** The FreeSurfer image analysis suite, which is documented and freely available online (<http://surfer.nmr.mgh.harvard.edu/>), was used for automatic volumetric segmentation of the MRI data and for the reconstruction, flattening, and automatic labeling and parcellation of cortical surfaces (1–7) (Fig. S1D). The MNE software (<http://www.nmr.mgh.harvard.edu/martinos/userInfo/data/sofMNE.php>) was used for creating three-layer boundary element conductivity models and cortically constrained source models for forward and inverse modeling (Fig. S1E). The MNE was also used for MEEG-MRI colocalization and for the preparation of the forward and inverse operators (8–11) (Fig. S1 E and F). Individual subjects' source models were based on tessellated cortical surfaces on which the dipoles were normal to the surface and had a 7-mm dipole-to-dipole separation. The source models had a total of  $n_d = 6,000$ – $8,500$  dipoles (source-model vertices) in the two cerebral hemispheres.

MEEG sensor signals,  $Y$ , are linearly related to the current strengths of the  $n_d$  source dipoles,  $X = [x_k]$ ,  $k = 1 \dots n_d$ , such that  $Y(t) = \Gamma X(t) + N(t)$ , where  $N$  denotes noise and  $\Gamma$  is the lead field matrix (i.e., the forward operator that relates the source dipole strengths to the sensor level data jointly acquired by MEG planar gradiometers, MEG magnetometers, and EEG electrodes). We obtained  $X(t)$  from measured  $Y(t)$  by using a minimum norm estimator (8), such that  $X(t) = MY(t) = R\Gamma^{-1}(\Gamma R\Gamma^{-1} + \lambda^2\chi)^{-1}Y(t)$ , where  $M$  is the inverse operator,  $\lambda^2$  is a regularization parameter,  $R$  is the source covariance matrix, and  $\chi$  is the noise covariance matrix. We used  $\lambda^2 = 0.05$  and a multiple of the identity matrix as  $R$ . The inverse operator,  $M$ , for each wavelet frequency was prepared with noise covariance matrices computed across the real parts of filtered single-trial prestimulus baseline windows (Fig. S1G). Frequency-specific complex inverse solutions,  $X_F = [x_{F,k}]$ , were obtained from the inverse estimates of the real ( $Y_{F,RE}$ ) and imaginary ( $Y_{F,IM}$ ) parts of the filtered MEEG data,  $Y_F$ , such that  $X_F = M_F Y_{F,RE}(t) + i M Y_{F,IM}(t)$ , where  $i$  is the imaginary unit (Fig. S1H).

**Surface Parcellation.** Two parcellations of the source model were used in the quantification of interareal phase synchrony. Here, the term “parcellation” means a set of patches, each of which defines a set of source model vertices. The first one, a cluster parcellation,  $P_{CL}$ , with 365 patches, was obtained with a mean linkage clustering algorithm that yielded maximally independent cortical patches in individual anatomy and was used to compute the within-subject phase synchrony estimates. The second one, an anatomical landmark parcellation,  $P_{AN}$ , was based on automatic cortical labeling (5) and was used for group statistics and visualization.

**Clustering parcellation.** Source-space interaction mapping would be directly achievable through a computation of source model vertex-by-vertex ( $n_d \times n_d$ ) phase synchrony matrices, but they

would be highly redundant and computationally cumbersome. Hence, after the inverse modeling and before the phase synchrony estimation, we collapsed the 6,000–8,500 time series of the source vertices into 365 time series of the cortical patches (Fig. S1I). The collapsed inverse solution,  $X_{F,P} = [x_{F,P,l}]$ ,  $l = 1 \dots n_p$ , is given by  $X_{F,P} = \Pi(X_F, P)$ , where  $\Pi$  is a collapse operator;  $P$  is the parcellation,  $P = [p_l]$ ; and  $n_p$  is the number of patches,  $p_l$ , in  $P$ . We defined  $\Pi$  so that the complex time series of a patch's phase is given by  $x_{F,P,l}(t,f) = \rho_l/|\rho_l|$ , where  $\rho_l = q_l^{-1} \sum_u x_{F,u}$ ,  $u = 1 \dots q_l$  are the indices of the source vertices in patch  $p_l$  and  $q_l$  is the number of source vertices in that patch. Within-subject phase synchrony analysis was obtained with a  $P_{CL}$  that maximized the separability of cortical sources in individual anatomy. The parcellation was based on an estimate of artifactual synchrony that was obtained by simulating white noise in each source model vertex, forward modeling it to achieve a virtual MEEG recording,  $Y_v$ ; filtering and inverse modeling the data to obtain  $X_{F,v}$ ; and then estimating from  $X_{F,v}$  across 5,000 independent samples the complete pairwise source vertex-by-vertex phase synchrony matrix,  $I_v$  (Fig. S1J). This “artefactual synchrony matrix” thus quantifies the artifactual correlations caused by the MEEG measurement as well as those arising in the inverse modeling. A total of 365 cortical patches were obtained with mean linkage clustering of  $I_v$ , such that vertices, or clusters of vertices, with the strongest pair-wise phase synchrony were clustered together. For each clustering step, parcellation was applied to the 5,000-sample  $X_{F,v}$  and the artifact synchrony matrix was recomputed. This process was iterated until 365 source clusters remained (Fig. S1K).

**Neuroanatomical parcellation.** The FreeSurfer software parcellates and labels the cortical surface into 156 patches in two hemispheres based on gyral and sulcal structure and neuroanatomical convention (see above; Fig. S1D). These patches were the basis of our group level statistics and visualization. To exclude the possibility that the size variability of these patch-biased network analyses, we further split the largest and merged the smallest patches to obtain an anatomical parcellation,  $P_{AN}$  (Fig. S1L). We first iteratively searched for patches that had the largest size in the subject population and split them along the axis (anterior-posterior, lateral-medial, ventral-dorsal) that had the largest mean variance (Fig. S1L). This procedure was used to obtain a total of 240 patches in the two hemispheres with split directions that were identical for every subject. We then iteratively merged smaller patches with their neighbors to obtain a collection of 106 patches in two hemispheres, with  $63 \pm 23$  source space vertices per patch (mean  $\pm$  SD).  $P_{AN}$  thus retains the individual anatomical accuracy and yet provides a common basis for statistics across subjects.

**Estimation of Interareal Interactions in Source Space.** We used the collapsed inverse estimates,  $[X_{F,P,r}(t,f)]$ , of single trials,  $r$  ( $r = 2 \dots n_t$ ), for mapping cortex-wide interareal interactions, such that  $I = S([X_{F,P,r}])$ , where  $I$  [ $I = I(t,f)$ ] is an  $n_p \times n_p$ -sized matrix of interaction strengths,  $S$  is the interaction operator, and  $n_t$  denotes the total number of trials in the experimental condition (Fig. S1M). In this study, neuronal interactions were indexed by pair-wise phase synchrony of each cortical patch with every other patch. Two signals are said to be phase-synchronized if their phase difference distribution is nonrandom. Phase synchrony between a pair of patches,  $p_a$  and  $p_b$ , was quantified across trials by using a  $PLV$ ,  $PLV(t,f)$ , that was given by  $PLV = (n_t - 1)^{-1} |\sum_r (x_{F,P,a,r} x_{F,P,b,r}^*)|$ , where  $\sum_r$  denotes the sum across trials and  $x^*$  is the complex conjugate of  $x$ . The interaction matrix,  $I$ , for a given

parcellation,  $P$ , is then obtained by computing  $PLV$  for each pair  $(a, b)$ ,  $a = 1 \dots n_p$ ,  $b = 1 \dots n_p$ , which is also conveniently given by the outer product  $I = (n_r - 1)^{-1} |\sum_r (X_{F,P,r} \otimes X_{F,P,r}^*)|$ . An estimate,  $I_{evk}$ , of phase synchrony artifactually caused by signal components that were phase-locked to the sample stimulus, “evoked synchrony,” was estimated as for  $I$  above but by using a trial-shifted  $PLV$  that was given by  $PLV_{evk} = (n_r - 1)^{-1} |\sum (x_{F,P,a,r} x_{F,P,b,r-1}^*)|$ .  $I$  and  $I_{evk}$  were obtained for each subject, condition, time window (width = 300 ms, overlap = 145 ms), and wavelet center frequency (36 frequencies from 3 to 90 Hz). One wavelet with a center frequency at around 50 Hz was excluded from the analyses because of putative mains interference.

**Group Statistics.** In addition to the estimates of evoked phase synchrony,  $I_{evk}$ , we obtained estimates of the average level of phase synchrony in the presample-stimulus baseline,  $I_{bl}$ , and used these to remove artifactual and task-irrelevant components from the individual subject’s interaction strength matrices,  $I(t, f)$ . This correction was given by  $I_{corr}(t, f) = I(t, f) - \max[I_{bl}(f), I_{evk}(t, f)]$ , where  $I_{bl}(f)$  is the mean of  $I(t, f)$  across the baseline period (time windows with centers from  $-450$  to  $-140$  ms) and the max-operation is the maximum of  $I_{bl}(f)$  or  $I_{evk}(t, f)$  separately for each  $PLV(t, f)$ . Thus, the  $I_{corr}(t, f)$  values were biased neither by baseline nor by stimulus-locked activity. The baseline correction also intrinsically removes possible artifactual pair-wise synchrony arising from the MEEG recording or inverse modeling. Individual subjects’ corrected interaction matrices,  $I_{corr}(t, f)$ , which were obtained in  $P_{CL}$ , were then morphed by patch area-weighted averaging into those individuals’  $P_{ANS}$  to obtain  $I_{AN, corr}(t, f)$  for usage in group statistics.

The statistical interaction matrix,  $I_S(t, f)$  (Fig. S1N), contains the significance ( $P$  value) of each pair-wise interaction in each condition. We obtained  $I_S(t, f)$  from the  $I_{AN, corr}(t, f)$  of all subjects by applying a statistical test separately for each pair-wise  $PLV$  for each  $t$  and  $f$ . In the average condition,  $I_{AN, corr}(t, f)$  values were tested against a null hypothesis of  $PLV \leq 0$  using the Wilcoxon signed rank test. For each subject, the  $I_{AN, corr}(t, f)$  was obtained by averaging the six  $I_{corr}(t, f)$  values that were computed separately with an equal number of trials corresponding to  $L_M$  ( $L_M = 1, 2, 3, 4, 5$ , and  $6$ ). In the load condition,  $I_{AN, corr}(t, f)$  values were obtained separately and with an equal number of trials for each  $L_M = 1, 2, 3, 4, 5$ , and  $6$ , and were then tested across subjects using the Spearman’s rank correlation test against a null hypothesis that  $PLV(L_M)$  is uncorrelated or negatively correlated with  $L_M$ . The interactions predicting individual behavioral memory capacity were identified so that we obtained the  $I_{corr}(t, f)$  for each  $L_M = 1, 2, 3, 4, 5$ , and  $6$  and searched the  $k_L$  that gave the best least-squares fit of the capacity function  $F_{cap}(L_M, g, k_L)$ , where  $g$  indicates gain parameter, with  $PLV(L_M)$ . These best-fitting  $k_L$  values were then tested across subjects with the Spearman’s rank correlation test against the null hypothesis that  $k_L$  values were uncorrelated or negatively correlated with the subjects’ individual behavioral capacity  $k_P$  (see above).  $F_{cap}(L_M, g, k_L)$  was obtained for each  $L_M$  ( $1 \dots 6$ ) so that the value of  $F_{cap}$  increased linearly between  $1 \leq L_M \leq k_L$  and remained at the maximum level from  $k_L \leq L_M \leq 6$ . During the least-squares fitting,  $g$  was used for scaling  $F_{cap}$ .

**Graph Characterization.** We used network metrics from graph theory to characterize the interaction data (12, 13) (Fig. S1O). In our graphs, vertices are the brain areas and the connecting edges are the interareal interactions. Binary and undirected graphs,  $G$ , were obtained from adjacency matrices  $A_G$  ( $A_G = T[I_S(t, f)]$ ), where  $T$  denotes a threshold operator. The thresholding was carried out by first nulling elements of  $I_S(t, f)$  for which  $P > A$ , where  $A$  is the  $A$  level. To compensate for false-positive results arising from multiple comparisons, we used the  $A$  level to indicate the proportion of false rejections of the null hypothesis and then

the total number of performed tests to predict the number of false discoveries. To obtain an FDR  $< 0.01$ , we removed 99% of the number of elements predicted to be false discoveries from the remaining nonzero elements of  $I_S(t, f)$  in decreasing order of  $p$ .

We used connection density,  $K$ , as the initial graph level measure of interareal connectedness (Figs. 1 and 4).  $K$  is the number of edges present in the graph (graph’s size) divided by the number of all possible edges. Vertex degree,  $d$ , denotes the number of edges connected to the vertex (Fig. 1C). A  $k$ -core analysis was used to identify densely interconnected “core” structures (Figs. S3, S5, and S6). Vertices belonging to a  $k$ -core are identified as those that remain after removing vertices with  $d < k$ , along with their edges iteratively until all remaining vertices have  $d \geq k$ . A graph’s maximum  $k$ -core number is the value of  $k$ , such that all vertices are removed with  $k + 1$ . The  $k$ -coreness of an individual vertex is the value of  $k$ , such that the vertex is removed with  $k + 1$ . We identified network hubs by using degree and betweenness centrality. Betweenness centrality,  $C_{B,i}$  of vertex  $i$  is the number of shortest paths between pairs of other vertices that pass through  $i$  divided by the total number of shortest paths between pairs of other vertices. Betweenness centrality was computed with a Matlab algorithm provided in the Brain Connectivity Toolbox (<http://sites.google.com/a/brain-connectivity-toolbox.net/bct/home>).

To estimate the edge-wise similarity of two graphs (Fig. S2), we define the edge-wise graph similarity index,  $S^E$ ,  $0 \leq S^E \leq 1$ , between binary  $G_i$  and  $G_j$ , such that  $S^E = |A_{G,i} \cap A_{G,j}| / |A_{G,i} \cup A_{G,j}|$ . For statistics,  $S^E$  values were compared against the distribution of  $S^E$  values obtained for order- and mean degree-matched random graphs. We corroborated the edge-wise similarity data with a vertex-wise similarity metric,  $S^V$ , that was obtained with a Spearman’s rank correlation coefficient and statistics of vertex degree sequences.

For merging a set of graphs  $G_1 \dots G_N$  into a matching graph,  $G_M$ , we first obtained a weighted matching adjacency matrix,  $A_{G,M}$ , from binary adjacency matrices  $A_{G,i}$  ( $i = 1 \dots N$ ), with  $A_{G,M} = N^{-1} \sum(A_{G,i})$ . Elements of  $A_{G,M}$  are the edge-matching indices  $M^E$  ( $0 \leq M^E \leq 1$ ). To obtain comparable network characterizations and visualizations (Figs. S3, S5, and S6), the binary  $G_M$  values were obtained from  $A_{G,M}$  by thresholding with as large a  $M^E_{min}$  as possible that gave a  $K \geq 0.1$  but so that the minimum value of  $M^E_{min}$  was 0.1. The simplified graphs shown in Figs. 2–4 were obtained from Figs. S3, S5, and S6, as indicated in figure legends, by finding an  $M^E_{min}$  that gave a  $K \geq 0.02$ . Note that the  $M^E_{min}$  of each graph (required for achieving the constant  $K$  across graphs) is reported in the corresponding figure legend and, in itself, indexes the degree of spectral and temporal stability of the matching graph. The progressive pruning of the matching graphs by an increasing  $M^E_{min}$  is illustrated in Fig. S8. Spectral colocalization graphs (details provided in Fig. S4) were obtained as matching graphs across the frequency bands with the addition of thresholded band-specific edge coloring at the matching graph threshold  $M^E_{min} = 0.15$ , which gave  $K = 0.1$  in both the average and load conditions. As in Figs. 2 and 3, each of the three frequency bands contained four time windows and wavelet frequencies.

The graph structures reported in this study were robust against even large changes in the  $A$  level, FDR correction, and  $M^E_{min}$ . The data were also robust against moderate changes in the time window and frequency band selections.

#### Relation Between Amplitude Modulations and Phase Synchrony.

Theoretically, changes in oscillation amplitudes may cause changes in phase synchrony. This is because an increase in the signal-to-noise ratio (SNR) enables more accurate estimates of the phase and, consequently, leads to a greater  $PLV$  with the same underlying neuronal interaction. In our data, however, several lines of evidence rule out the possibility that changes

in the SNR could cause the observed changes in long-range synchrony.

We first simulated the dependence of the *PLV* of coupled signals on the SNR and on the coupling strength (Fig. S7A). The simulations were based on two parametrically coupled noise processes,  $X$  and  $Y$ , with a variable magnitude of uncorrelated “measurement noise,” such that  $X = A + cB + sC$  and  $Y = B + cA + sD$ , where  $A$ ,  $B$ ,  $C$ , and  $D$  are independent realizations of white noise in the range from  $-1$  to  $1$ ;  $c$  is the coupling constant; and  $s$  is the noise amplitude parameter, such that  $s = \text{SNR}^{-1}$ . SNR is thus defined here as the amplitude of the signal divided by the amplitude of the noise. To obtain the complex time series of the phase,  $X$  and  $Y$  were Morlet wavelet-filtered to give  $X_F = X * h(t, f)$  and  $Y_F = Y * h(t, f)$  and were normalized to  $X_{F,n} = X_F / |X_F|$  and  $Y_{F,n} = Y_F / |Y_F|$ , where  $f = 0.1f_s$  and  $f_s$  is the sampling rate. To evaluate the sensitivity of phase synchrony estimation to SNR, the expected *PLV* was estimated across the time series, such that  $plv = n_r^{-1} |\Sigma (X_{F,n} Y_{F,n}^*)|$ , where  $n_r = 10^5$  is the number of noise process samples and  $PLV = n_s^{-1} \Sigma (plv)$ , where  $n_s = 10^5$  indicates the number of realizations of the noise processes for each value of  $c$  and  $s$ . The  $s$  parameter was varied to produce log-linear SNR spacing where  $\text{SNR}_{i+1} = \text{SNR}_i \times 1.3$ . Fig. S7A shows that the *PLV* is dependent both on the strength of coupling and on the SNR. The constant change in SNR makes it now easy to plot the relative change in the *PLV* for each step in SNR by defining relative change as  $(PLV_{i+1} - PLV_i) / PLV_i$  (Fig. S7B). Fig. S7B shows that at  $\text{SNR} > 1$ , the relative increase in *PLV* for a constant relative improvement in SNR (here, 1.3) decays rapidly, such that at higher SNRs, a change in SNR has only a minor effect on the estimated *PLV*. Fig. S7B also shows that at  $\text{SNR} < 1$ , the changes in *PLV* caused by modulations of SNR are large and dependent on the true (and underestimated, compare with Fig. S7A) coupling strength.

By mapping with simulations the *PLV* as a function of both  $c$  and SNR and by estimating the *PLV*, SNR, and amplitude levels from recorded data, it is possible to predict the effect that an amplitude change would have on the *PLV* and then compare this prediction with the recorded change in *PLV*. We estimated the average apparent SNR of MEG gradiometers and magnetometers for each subject in the frequency bands of interest ( $\alpha$ ,  $\beta$ , and  $\gamma$ ) by comparing the recorded data with empty-room MEG recordings that were performed before or after each recording session. The apparent SNR (aSNR) was estimated from the averaged wavelet amplitudes, such that  $\text{aSNR} = n_{c,\text{MEG}}^{-1} \Sigma_j [(A_{b,j} - A_{n,j}) / A_{n,j}]$ , where  $n_{c,\text{MEG}}$  is the number of MEG channels ( $n = 306$ ),  $A_{b,j}$  indicates the average amplitude of the experimental data (neuronal activity + environmental noise), and  $A_{n,j}$  indicates the average amplitude of empty room noise for MEG channel  $j$ . The mean aSNR values were  $\alpha$ -band =  $3.42 \pm 1.67$  (mean  $\pm$  SD),  $\beta$ -band =  $1.55 \pm 0.76$ , and  $\gamma$ -band =  $0.75 \pm 0.46$ . It is important to note that because amplitude is a nonlinear metric, the relation between aSNR and the true SNR is a nonlinear function [i.e., in the simulations above, the (true) SNR ratio was defined to be the ratio of amplitudes of signal and noise, but the (experimentally quantifiable) amplitude of the composite signal is less than the sum of the amplitudes of signal and noise because it is the real values, and not the amplitudes of the signal and noise, that are summed]. The function linking the aSNR and SNR was estimated numerically by creating  $2 \cdot 10^7$  sample white noise signal, noise, and signal plus noise time series as above with a log-linearly increasing SNR. Now, the aSNR as a function of SNR is given by  $\text{aSNR} = (A_{S+N} - A_N) / A_N$ , where  $A_{S+N}$  is the average amplitude of the wavelet-filtered signal plus noise time series and  $A_N$  is the average amplitude of the wavelet-filtered noise time series (Fig. S7C).

We used grand average baseline and VWM retention period amplitude data, the grand average aSNR estimates, and the simulation-derived model to predict the change in *PLV* that would be caused by the recorded change in amplitude. We made

the approximation that after inverse modeling, the grand average aSNR corresponds to the grand average band amplitude,  $A$ , across the cortical surface. The patch-wise aSNR<sub>*i*</sub> was then obtained from the absolute patch amplitude  $A_i$  by scaling:  $\text{aSNR}_i = \text{aSNR} \times A_i / A$ . Thus, grand average amplitudes of average condition baseline and the one-object condition retention period were used to estimate the initial patchwise aSNR, and the grand average amplitudes of the average and six-object condition retention periods gave the amplitude change-modulated patchwise aSNR. The observed and SNR change-predicted *PLV* values corresponding to these “initial” and “modulated” conditions were obtained for those pairs of cortical patches in which the recorded *PLV*s were statistically significant ( $P < 0.01$ , uncorrected). The choice of the A level, however, did not have a noticeable influence on the conclusions drawn hereafter. The SNR change-related change in each interareal *PLV* was predicted by first obtaining the initial condition *PLV* and evaluating the average initial and modulated aSNRs of the corresponding pair of cortical patches. The true initial and modulated SNRs were obtained from the aSNRs by interpolating the data in Fig. S7C. The modulated condition *PLV* was then given by first interpolating the data in Fig. S7A at the initial *PLV* and SNR to find the  $c$  corresponding to the initial *PLV* and then using this  $c$  and the modulated SNR to predict the modulated *PLV*.

In the average condition, the modulations of amplitude, *PLV*, and SNR were compared between the averaged baseline values and the four retention period time windows for each of the four wavelets in each frequency band. The load condition was approximated by a direct time frequency window-by-time frequency window comparison of the retention periods of the six-object and one-object memory load conditions to allow a quantitative evaluation of the *PLV* amplitude relation therein. Hence, in both the average and six-object vs. one-object conditions, we obtained data from 16 graphs per frequency band.

In the average condition (Fig. S7D), the *PLV* changes predicted by the change in amplitude from baseline to the retention period (Fig. S7D, red dots) clearly did not explain the experimentally observed *PLV* changes (Fig. S7D, black dots) in the  $\alpha$ -,  $\beta$ -, or  $\gamma$ -band. This was not brought about by the aSNR scaling, because a nonscaled aSNR did not predict larger *PLV* changes (Fig. S7D, blue dots). Overall, the predicted *PLV* changes were much smaller in magnitude than the observed *PLV* changes. Moreover, because the retention period amplitudes were largely suppressed below the baseline level, the predicted *PLV* values were opposite to the recorded *PLV* changes in most cases. It is thus important to note that a widespread cortical amplitude suppression is associated with an increase in interareal phase synchrony (numerical details provided in Fig. S7F) in this study. Hence, the common interpretation of an amplitude suppression to imply “desynchronization” might not be accurate for spatial scales larger than those that can be separated with source modeling.

With the six-object vs. one-object condition, we addressed whether there was a load-dependent increase in the retention period amplitude that could predict the load-dependent increase in phase synchrony. Indeed, the data revealed both an amplitude and a *PLV* increase from the one- to the six-object memory load and that the *PLV* was weakly correlated with amplitude (Fig. S7E, numerical details provided in Fig. S7F). The enhanced *PLV*, however, did not arise from the amplitude increase-caused enhancement in the SNR, because the predicted *PLV* values were saliently smaller than the observed values. It is also clear that a considerable proportion of the strengthened *PLV* values are associated with negative or close-to-zero amplitude modulations (Fig. S7E). In the  $\alpha$ -band, where the load-condition effects were the strongest, the mean relative change in *PLV* [ $11.3 \pm 4.6\%$  (mean  $\pm$  SD)] was more than 18 times greater than the predicted SNR-caused change in *PLV* ( $0.6 \pm 0.5\%$ ). We also







rected) throughout the retention period (four time windows). The gray rectangle indicates the four time windows denoted as the retention period in this study. (B) Average condition vertex similarity statistics among time windows. Frequency bands and colors are as in A. Load condition edge (C) and vertex similarity (D) statistics. Frequency bands and colors are as in A. Taken together, the data in A–D indicate that  $\alpha$ -,  $\beta$ -, and  $\gamma$ -frequency band networks are significantly similar throughout the VWM retention period, which we define to be the last four time windows with centers from 480 to 945 ms. (E) Average condition edge similarity statistics among all wavelet frequencies (x and y axes) across the retention period. The colors indicate the number of graphs that were significantly similar for each frequency-frequency pair ( $P < 0.01$ , Bonferroni-corrected with the number of graphs in the retention period; colors: yellow, 4; orange, 3; red, 2; purple, 1) (4). Gray squares indicate the  $\alpha$ -,  $\beta$ -, and  $\gamma$ -frequency bands. (F) Average condition vertex similarity statistics among wavelet frequencies. Colors are as in E. Load condition edge (G) and vertex similarity (H) statistics are as in E. The data in E and F show that in the average condition, graphs within  $\alpha$ -,  $\beta$ -, and  $\gamma$ -bands were strongly self-similar, but there was less overlap across frequency bands. In the load condition (G and H), on the other hand, graphs were significantly similar almost throughout the  $\alpha$ -,  $\beta$ -, and  $\gamma$ - (10–40 Hz) ranges.





$d_{\max} = 42, k_{\max} = 8$ ). (F) Individual graph-based hub classification in the  $\gamma$ -band. C, central; CA, calcarine; CI, cingulate; CN, cuneus; F, frontal; G, gyrus; IN, insula; P, parietal; S, sulcus; T, temporal; O, occipital; a, anterior; ang, angular; cal, callosal; col, collateral; i, inferior; int, intra; ist, isthmus; fus, fusiform; la, lateral; m, middle; orb, orbital; p, posterior; pa, para; pah, parahippocampal; pla, planum temporale and polare; pe, peri; pr, pre; po, post; s, superior; tr, transverse.



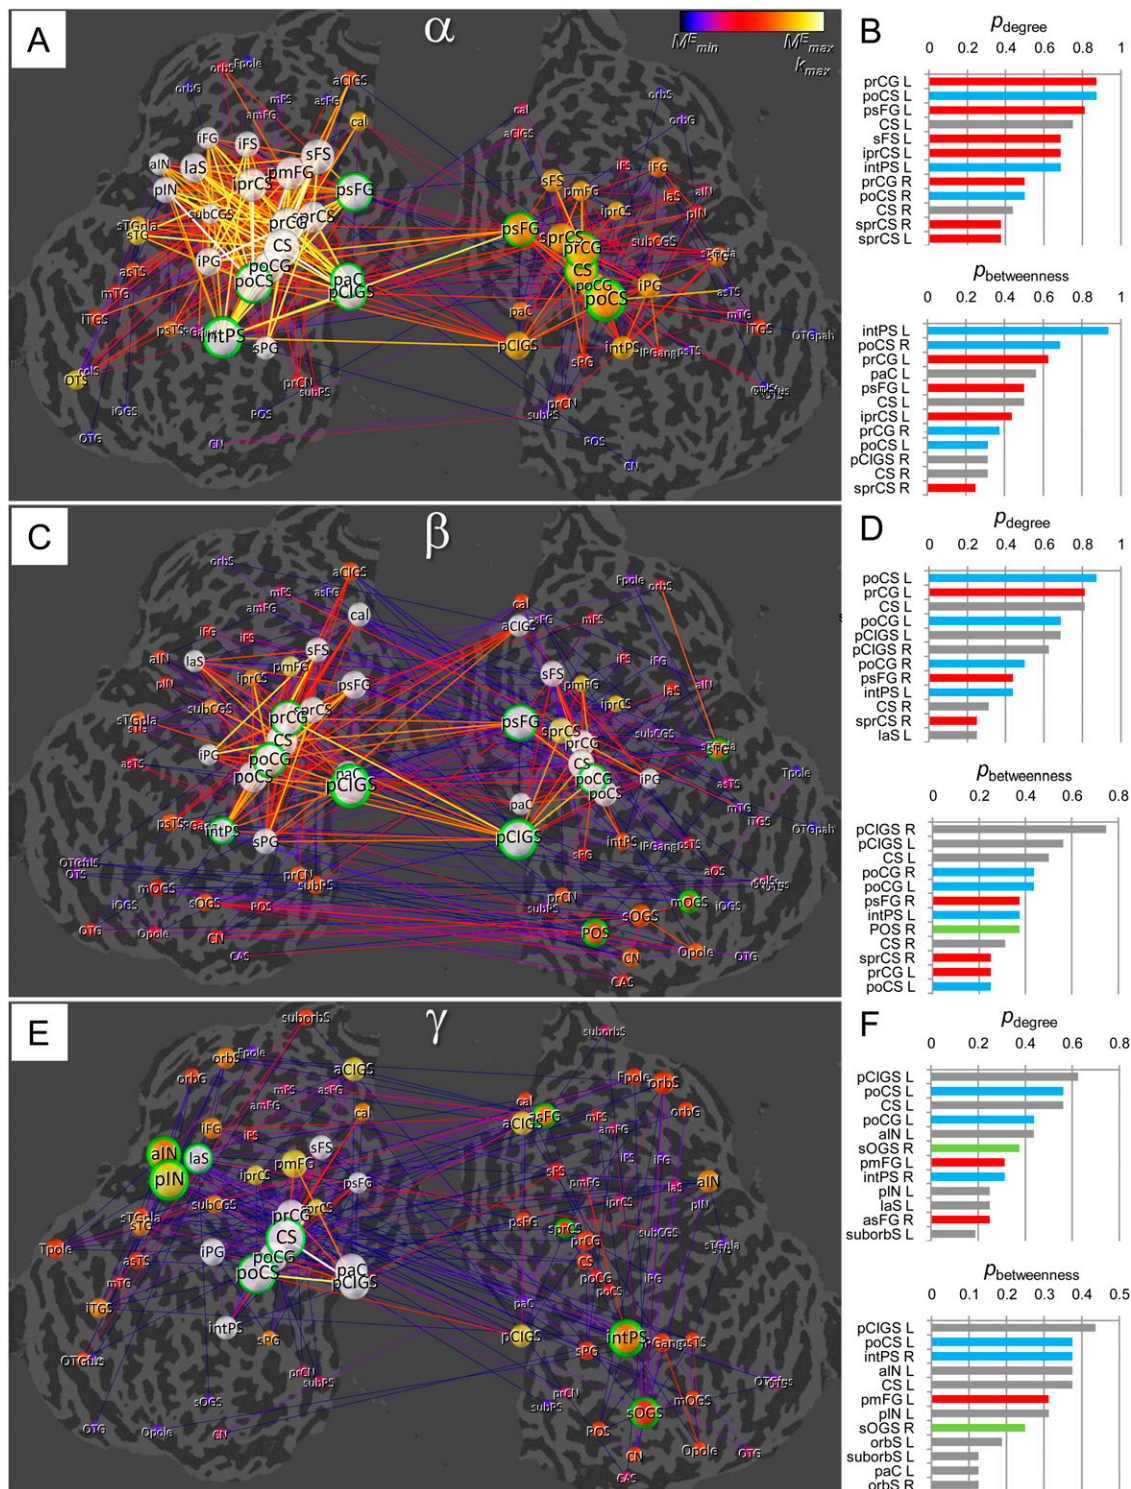

**Fig. S5.** Complete load condition matching graphs and hub classification for Fig. 3. (A) Load condition:  $\alpha$ -band ( $M^E_{\min} = 0.43$ ,  $M^E_{\max} = 1$ ,  $d_{\max} = 36$ ,  $k_{\max} = 14$ ). (B) Hub classification of the individual  $\alpha$ -band load condition graphs that were used in the matching graph in A. The bars and colors are as in Fig. S3. (C) Load condition matching graph for the  $\beta$ -band ( $M^E_{\min} = 0.18$ ,  $M^E_{\max} = 1$ ,  $d_{\max} = 35$ ,  $k_{\max} = 11$ ). (D) Individual graph-based hub classification in the  $\beta$ -band. (E) Load condition matching graph for the  $\gamma$ -band ( $M^E_{\min} = 0.1$ ,  $M^E_{\max} = 0.69$ ,  $d_{\max} = 22$ ,  $k_{\max} = 7$ ). (F) Individual graph-based hub classification in the  $\gamma$ -band. C, central; CA, calcarine; CI, cingulate; CN, cuneus; F, frontal; G, gyrus; IN, insula; P, parietal; S, sulcus; T, temporal; O, occipital; a, anterior; ang, angular; cal, callosal; col, collateral; i, inferior; int, intra; ist, isthmus; fus, fusiform; la, lateral; m, middle; orb, orbital; p, posterior; pa, para; pah, parahippocampal; pla, planum temporale and polare; pe, peri; pr, pre; po, post; s, superior; tr, transverse.





aSNR constant across the cortical surface; details provided in *SI Text*). The *PLV* and amplitude modulations were obtained by comparing the baseline and retention periods, such that the relative change in *PLV* =  $(PLV_R - PLV_{BL})/PLV_{BL}$  and the relative change in amplitude =  $(A_R - A_{BL})/A_{BL}$ , where the subscripted R denotes the retention period and the subscripted BL denotes the baseline. (E) Relative change in *PLV* as a function of the relative change in amplitude in the six-object vs. one-object condition that was used to investigate the memory load effects on phase synchrony and amplitude modulation. Colors are as in D. The relative change in *PLV* =  $(PLV_{6O} - PLV_{1O})/PLV_{1O}$  and the relative change in amplitude =  $(A_{6O} - A_{1O})/A_{1O}$ , where subscripted 1O and 6O denote the retention periods of one-object and six-object memory load conditions, respectively. (F) Summary of the numerical details. Pred., predicted; Rel., relative.

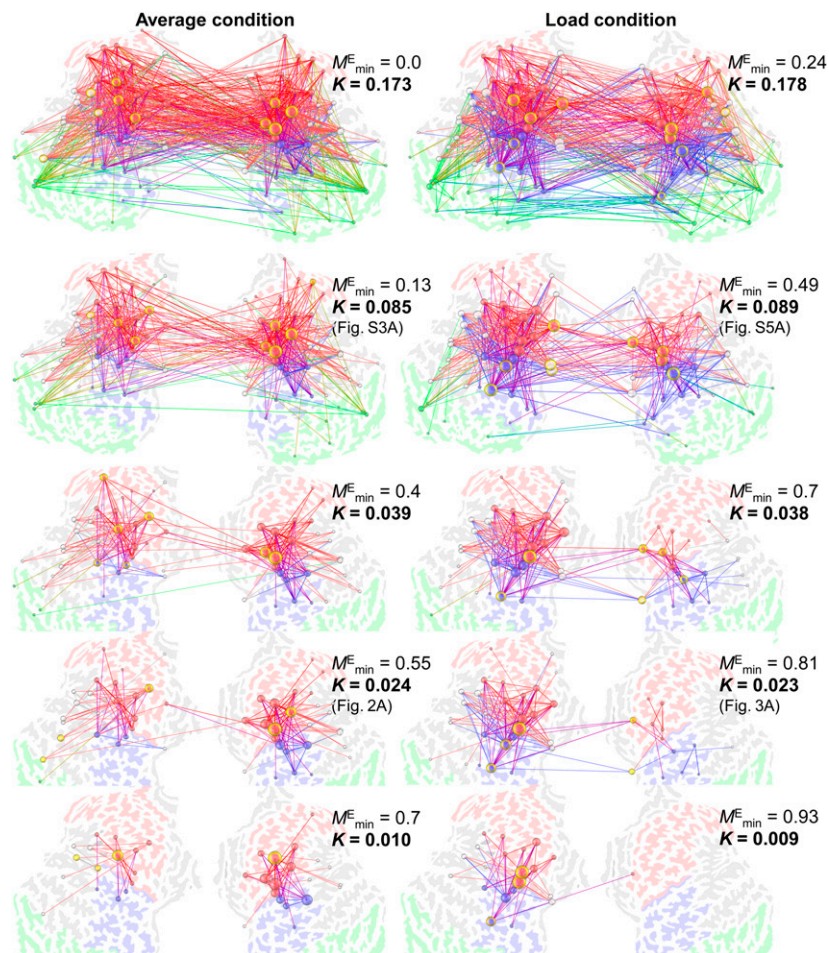

**Fig. S8.** Illustration of graph pruning by increasing the minimum edge-matching index ( $M_{\min}^E$ ). (Left) Column shows the average condition graph in the  $\alpha$ -band at five  $M_{\min}^E$  levels (0, 0.13, 0.4, 0.55, and 0.7), which indicates the minimum proportion of graphs from all graphs in the matching graph in which a given edge must be present (significant) to be visualized. The edge and vertex coloring, the vertex sizes and edge thicknesses, and the identification of hubs correspond to the scheme used in Figs. 2–4. At  $M_{\min}^E = 0$ , all significant edges in any of the 16  $\alpha$ -band retention period graphs are visualized. At  $M_{\min}^E = 0.55$ , all visualized edges are present in at least 55% of the graphs (i.e., in 9 of 16 graphs). The connection density,  $K$ , decreases with increasing  $M_{\min}^E$ . The values of  $K$  corresponding to the visualized values of  $M_{\min}^E$  are shown in the figure. (Right) For a pair-by-pair comparison, the load condition graphs at the same  $K$  levels are shown.
